# Supplementary material for: Rapid room-temperature H2S detection based on Bi2S3/CuO heterostructures: the synergy of increased surface-adsorbed oxygen and a heterojunction effect
Source: Royal Society of Chemistry journal article supplement (doi:10.1039/d4qi01542h), 2024-11-25
Supplement: d4qi01542h1.pdf [file d4qi01542h1.pdf]

**Supporting Information**

**Rapid room-temperature H<sub>2</sub>S detection based on Bi<sub>2</sub>S<sub>3</sub>/CuO heterostructures: the synergy of increased surface-adsorbed oxygen and heterojunction effect**

Chengcheng Hu<sup>a</sup>, Meiling Yu<sup>a</sup>, Zhenze Zhou<sup>a</sup>, ChenDa Wei<sup>a</sup>, You Wang<sup>a,b\*</sup> and Juanyuan Hao<sup>a,b\*</sup>

<sup>a</sup> *School of Materials Science and Engineering, Harbin Institute of Technology, Harbin 150001, P. R. China. E-mail: jyhao@hit.edu.cn and y-wang@hit.edu.cn.*

<sup>b</sup> *Key Laboratory of Micro-Systems and Micro-Structures Manufacturing, Ministry of Education, Harbin 150001, P.R. China.*

## Experimental section

### Materials

Anhydrous ethanol ( $\text{CH}_3\text{COOH}$ ), Anhydrous bismuth nitrate ( $\text{Bi}(\text{NO}_3)_3 \cdot 5\text{H}_2\text{O}$ ) and Copper acetate ( $\text{Cu}(\text{CH}_3\text{COO})_2$ ) was purchased from China National Pharmaceutical Group Chemical Reagent Co., Ltd. sodium sulfide nonahydrate ( $\text{Na}_2\text{S} \cdot 9\text{H}_2\text{O}$ , purity  $\geq 99.0\%$ ) was purchased from Shanghai Aladdin Biochemical Technology Co., Ltd. Ethylene glycol was purchased from Tianjin Fuyu Fine Chemical Co., Ltd. All precursors were of analytical grade and used without further purification.

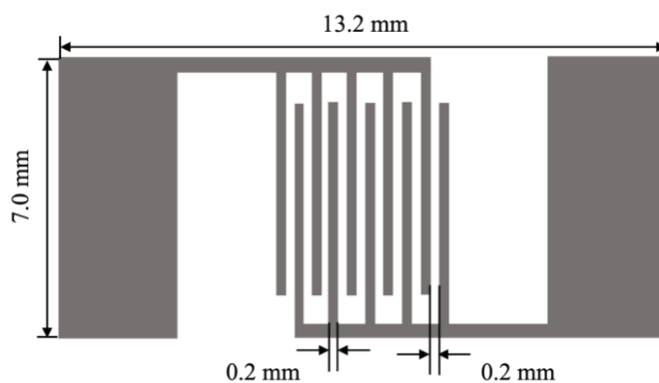

Fig. S1 Schematic diagram of the Ag-Pd interdigital electrode.

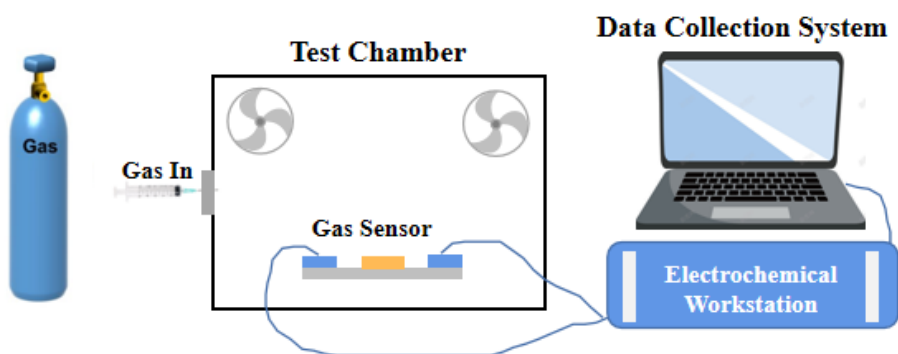

Fig. S2 Schematic diagram of the sensor measurement.

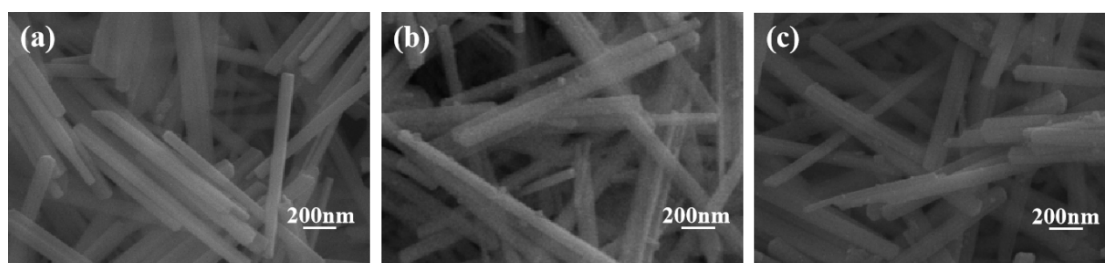

Fig. S3 SEM images of (a) pristine  $\text{Bi}_2\text{S}_3$  nanorods, (b)  $\text{Bi}_2\text{S}_3/\text{CuO}$ -1 heterostructures, and (c)  $\text{Bi}_2\text{S}_3/\text{CuO}$ -3 heterostructures.

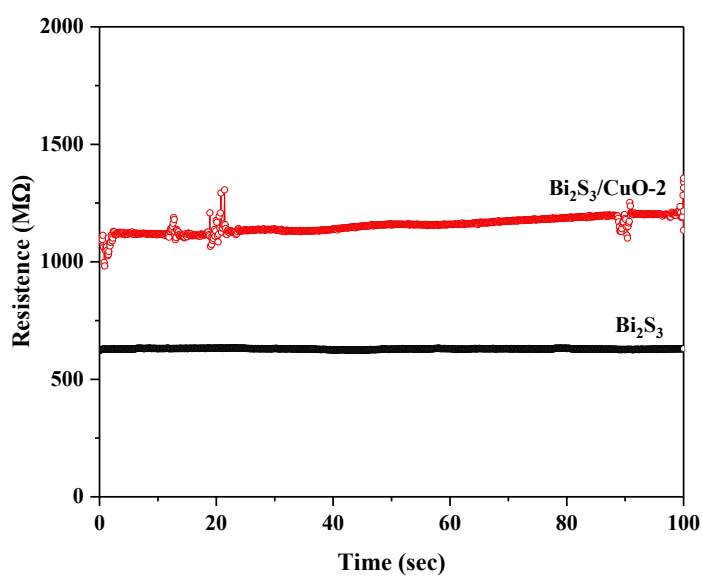

Fig. S4 The baseline curves of devices based on Bi<sub>2</sub>S<sub>3</sub>/CuO-2, Bi<sub>2</sub>S<sub>3</sub>

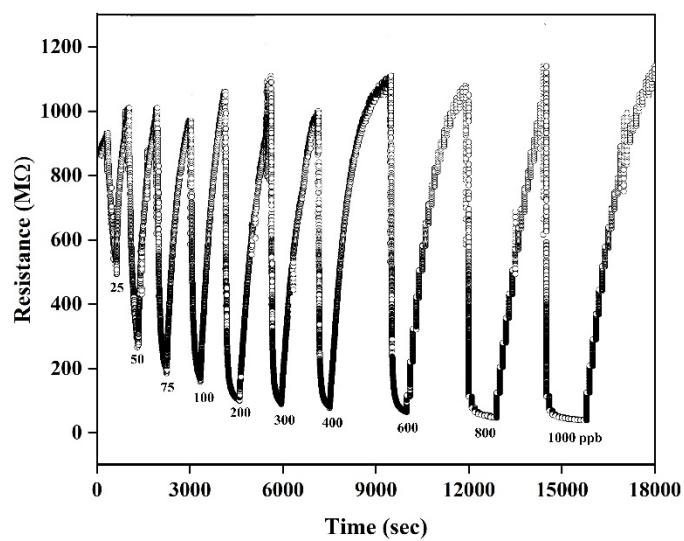

Fig. S5 Dynamic resistance curve of the Bi<sub>2</sub>S<sub>3</sub>/CuO-2 sensor to 25-1000 ppb H<sub>2</sub>S

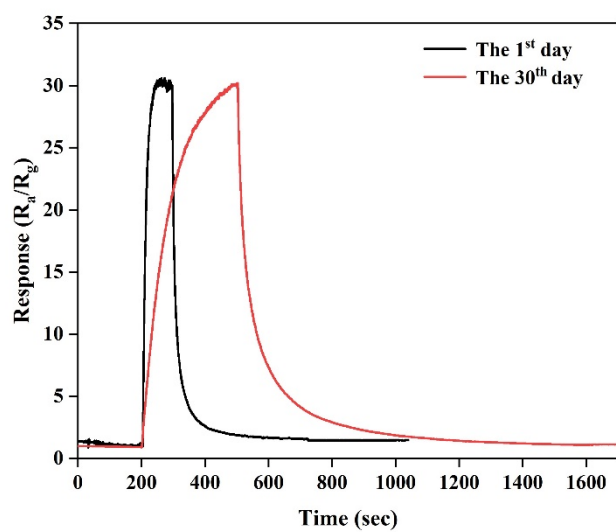

Fig. S6 Comparison of response curves to 1 ppm H<sub>2</sub>S on 1<sup>st</sup> and 30<sup>th</sup> day.

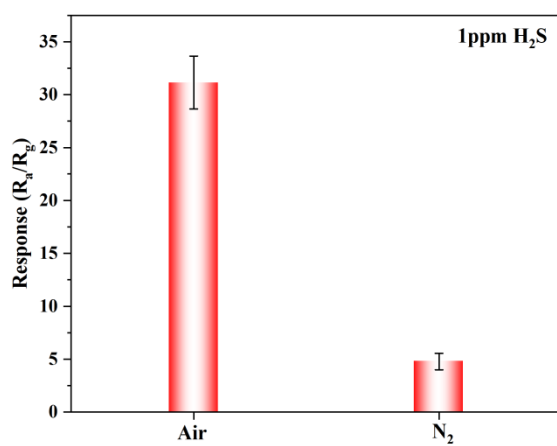

Fig. S7 The sensing response of Bi<sub>2</sub>S<sub>3</sub>/CuO-2 to 1 ppm H<sub>2</sub>S in different test condition: Air and N<sub>2</sub> as the background gases

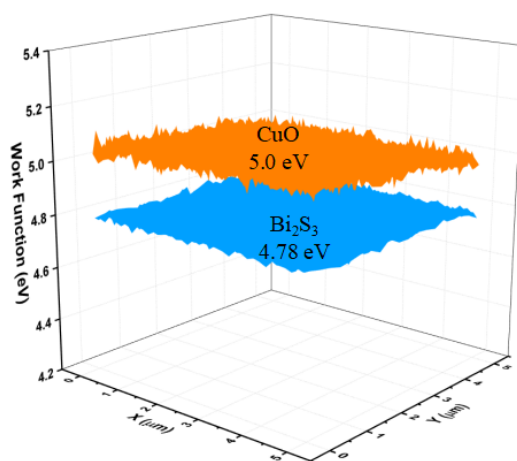

Fig. S8 Work functions of Bi<sub>2</sub>S<sub>3</sub> and CuO measured by KPFM

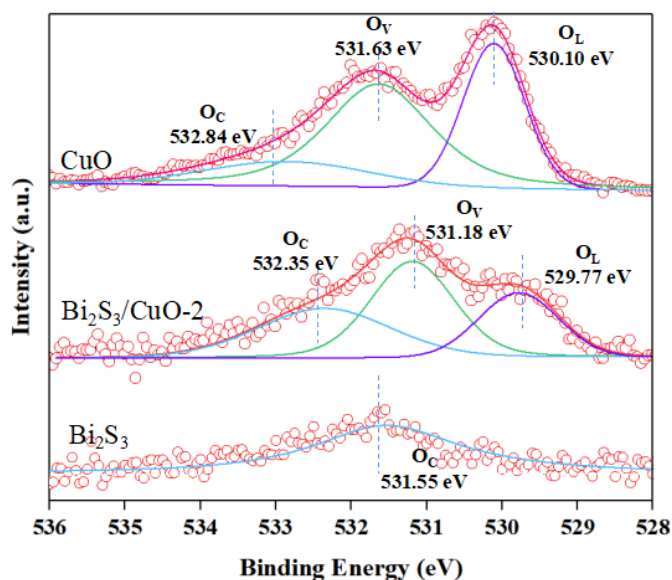

Fig. S9 O1s high-resolution XPS spectra of Bi<sub>2</sub>S<sub>3</sub>/CuO-2, Bi<sub>2</sub>S<sub>3</sub> and CuO

Table S1 Comparison of response and recovery time of Bi<sub>2</sub>S<sub>3</sub>/CuO-2 sensor to 1 ppm H<sub>2</sub>S on 1<sup>st</sup> and 30<sup>th</sup> day.

|                   | 1 <sup>th</sup> | 30 <sup>th</sup> |
|-------------------|-----------------|------------------|
| Response time (s) | 7.5             | 57.2             |
| Recovery time (s) | 620.6           | 626.3            |

Table. S2 The proportion of various types of oxygen in Bi<sub>2</sub>S<sub>3</sub>/CuO-2, CuO, Bi<sub>2</sub>S<sub>3</sub>

| Sample                                | O <sub>C</sub> | O <sub>V</sub> | O <sub>L</sub> |
|---------------------------------------|----------------|----------------|----------------|
| CuO                                   | 15.01%         | 54.41%         | 33.58%         |
| Bi <sub>2</sub> S <sub>3</sub> /CuO-2 | 33.06%         | 42.32%         | 24.62%         |
| Bi <sub>2</sub> S <sub>3</sub>        | 100%           | —              | —              |
